# Supplementary material for: Mn-derived Cs4PbX6 nanocrystals with stable and tunable wide luminescence for white light-emitting diodes
Source: Royal Society of Chemistry journal article supplement (doi:10.1039/d2tc00014h), 2022-01-01
Supplement: d2tc00014h1.pdf [file d2tc00014h1.pdf]

Supporting Information

## Mn derived Cs<sub>4</sub>PbX<sub>6</sub> nanocrystals with stable and tunable wide luminescence for white light-emitting diodes

Wenbin Shi,<sup>a</sup> Xiao Zhang,<sup>b\*</sup> Katarzyna Matras-Postolek,<sup>c</sup> Ping Yang<sup>a\*</sup>

<sup>a</sup>School of Material Science and Engineering, University of Jinan, Jinan, 250022, PR China. E-mail: mse\_yangp@ujn.edu.cn

<sup>b</sup>W/A School of Mines: Minerals, Energy and Chemical Engineering, Curtin University, Perth WA6845, Australia. E-mail: xiao.zhang7@postgrad.curtin.edu.au

<sup>c</sup>Chemical Engineering and Technology, Cracow University of Technology, Warszawska 24 St. 31-155 Krakow, Poland

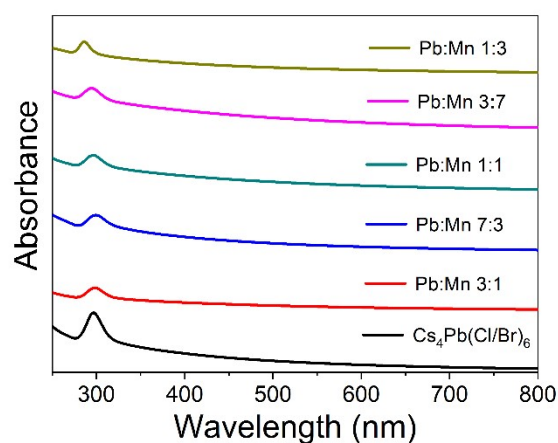

Fig. S1 Absorption spectra of Mn:Cs<sub>4</sub>Pb(Cl/Br)<sub>6</sub> NCs.

Table S1. Atomic ratio of Mn:Cs<sub>4</sub>PbCl<sub>6</sub> NCs from XPS analysis.

| Sample                               | Cs (%) | Pb (%) | Mn (%) | Cl (%) | C (%) |
|--------------------------------------|--------|--------|--------|--------|-------|
| Mn:Cs <sub>4</sub> PbCl <sub>6</sub> | 7.09   | 1.72   | 0.66   | 15.3   | 75.2  |

Table S2 Pb<sup>2+</sup> Lifetime parameters of Mn:Cs<sub>4</sub>PbCl<sub>6</sub> NCs

| Sample    | $\tau_1$ (ns) | B <sub>1</sub> (%) | $\tau_{ave}$ (ns) |
|-----------|---------------|--------------------|-------------------|
| Pb:Mn 1:0 | 2.7           | 100                | 2.7               |
| Pb:Mn 3:1 | 2.6           | 100                | 2.6               |
| Pb:Mn 7:3 | 1.5           | 100                | 1.5               |
| Pb:Mn 1:1 | 1.1           | 100                | 1.1               |
| Pb:Mn 3:7 | 0.6           | 100                | 0.6               |
| Pb:Mn 1:3 | 0.5           | 100                | 0.5               |

A single exponential function was applied to fit the decay curves:

$$F(t) = B_1 \exp(-t/\tau_1) \quad (1)$$

in which  $B_1$  is the normalized amplitudes of component.  $\tau_1$ , represent the time constants. The average lifetime ( $\tau_{ave}$ ) was calculated by:

$$\tau_{ave} = B_1 \tau_1^2 / B_1 \tau_1 \quad (2)$$

**Table S3**  $Mn^{2+}$  Lifetime parameters of  $Mn:Cs_4PbCl_6$  and  $Mn:Cs_4Pb(Cl/Br)_6$  NCs.

| Sample    | $Cs_4PbCl_6$ $\tau$ (ns) | $Cs_4Pb(Cl/Br)_6$ $\tau$ (ns) |
|-----------|--------------------------|-------------------------------|
| Pb:Mn 3:1 | 17.1                     | 5.1                           |
| Pb:Mn 7:3 | 16.7                     | 5.3                           |
| Pb:Mn 1:1 | 16.3                     | 6.7                           |
| Pb:Mn 3:7 | 11.1                     | 5.9                           |
| Pb:Mn 1:3 | 8.8                      | 4.4                           |

The PL lifetime decay data from Mn luminescence were measured by Hitachi-U4600 spectrometer.

The calculation formula is as follows:

Equation:  $y = y_0 + A_1 \exp(-(x-x_0)/t_1)$
